# Supplementary material for: A low-cost and water resistant biomass adhesive derived from the hydrolysate of leather waste
Source: Royal Society of Chemistry journal article supplement (doi:10.1039/c6ra27132d), 2017-01-01
Supplement: c6ra27132d1.pdf [file c6ra27132d1.pdf]

## Supporting information

### A low-cost and water resistant biomass adhesive derived from hydrolysate of leather wastes

Jianfei Zhou,<sup>a,b</sup> Teng Xu,<sup>b‡</sup> Xiaoling Wang,<sup>a</sup> Chang Liu,<sup>a</sup> Xuepin Liao,<sup>a,b\*</sup> Xin Huang<sup>a,b</sup> and Bi Shi<sup>b</sup>

**Table S1** <sup>29</sup>Si chemical shifts ( $\delta$  (ppm)) and relative peak area (I (%)) for T<sub>i</sub> and D<sub>i</sub> units derived from <sup>29</sup>Si CP-MAS NMR spectra.

| Sample   | T <sub>1</sub> |      | T <sub>2</sub> |       | T <sub>3</sub> |       | D <sub>1</sub> |       | D <sub>2</sub> |       |
|----------|----------------|------|----------------|-------|----------------|-------|----------------|-------|----------------|-------|
|          | $\delta$       | I    | $\delta$       | I     | $\delta$       | I     | $\delta$       | I     | $\delta$       | I     |
| GPDMS-CH |                |      |                |       |                |       | -7.9           | 30.55 | -14.8          | 69.45 |
| GPTMS-CH | -48.8          | 5.15 | -59.2          | 26.02 | -70.1          | 68.83 |                |       |                |       |
| GPTES-CH | -50.3          | 7.37 | -60.3          | 21.47 | -69.8          | 71.16 |                |       |                |       |

**Table S2** Wood failure results of the plywood panels bonded with CH-based adhesives in soak tests.

| SCA                 | The molar ratio of SCA to CH | Specimens failed in soak test |     |
|---------------------|------------------------------|-------------------------------|-----|
| Without SCA treated | 0                            | 3/5                           |     |
|                     | GPTDM                        | 0.1                           | 1/5 |
|                     |                              | 0.5                           | 1/5 |
|                     |                              | 1.0                           | 0/5 |
|                     |                              | 1.5                           | 0/5 |
|                     |                              | 2.0                           | 0/5 |
|                     |                              | GPTMS                         | 0.1 |
| 0.5                 | 0/5                          |                               |     |
| 1.0                 | 0/5                          |                               |     |
| 1.5                 | 0/5                          |                               |     |
| 2.0                 | 0/5                          |                               |     |
| GPTES               | 0.1                          |                               | 1/5 |
|                     | 0.5                          |                               | 1/5 |
|                     | 1.0                          | 0/5                           |     |
|                     | 1.5                          | 0/5                           |     |
|                     | 2.0                          | 0/5                           |     |
